# Supplementary material for: Multidimensional Epigenetic Clocks Reveal Physiological System-Specific Aging in Schizophrenia
Source: bioRxiv or medRxiv preprint supplement (doi:10.1101/2024.10.28.24316295), 2025-11-26

# Supplementary Figure 2

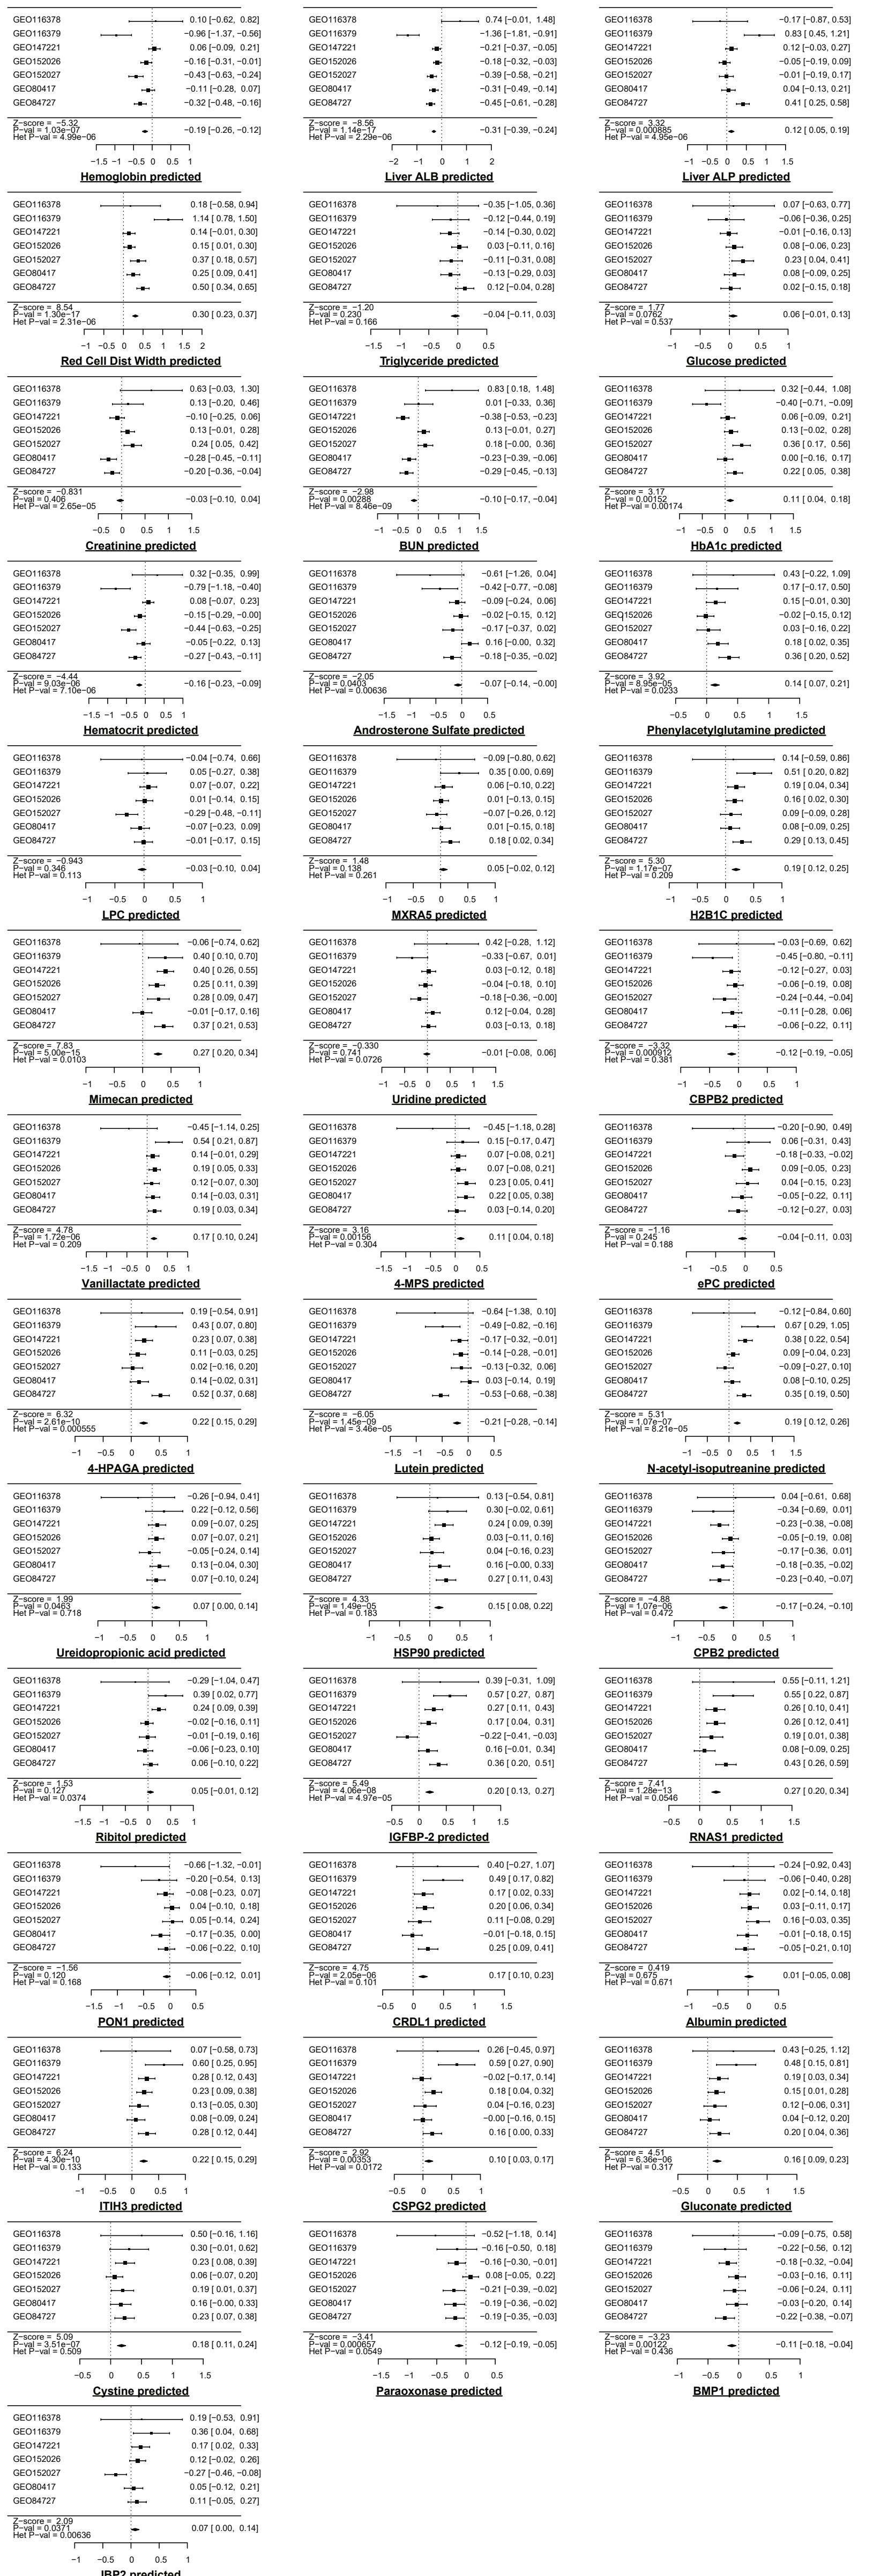

Supplement: Supplementary file [file media-4.pdf]
